# Supplementary material for: β-Carbon activation of saturated carboxylic esters through N-heterocyclic carbene organocatalysis
Source: Springer Nature journal article supplement (doi:10.1038/nchem.1710), 2013-07-19
Supplement: 41557_2013_BFnchem1710_MOESM112_ESM.mol [file 41557_2013_BFnchem1710_MOESM112_ESM.mol]

  ChemDraw07031306472D

 30 34  0  0  0  0  0  0  0  0999 V2000
   -1.4071    0.4854    0.0000 C   0  0  0  0  0  0  0  0  0  0  0  0
   -0.6952    0.0743    0.0000 C   0  0  0  0  0  0  0  0  0  0  0  0
    0.0559    0.4087    0.0000 C   0  0  0  0  0  0  0  0  0  0  0  0
    0.6060   -0.2023    0.0000 C   0  0  0  0  0  0  0  0  0  0  0  0
    0.1949   -0.9143    0.0000 C   0  0  0  0  0  0  0  0  0  0  0  0
   -0.6092   -0.7433    0.0000 C   0  0  0  0  0  0  0  0  0  0  0  0
   -1.2202   -1.2935    0.0000 C   0  0  0  0  0  0  0  0  0  0  0  0
    1.4236   -0.1163    0.0000 C   0  0  0  0  0  0  0  0  0  0  0  0
   -2.1216    0.0729    0.0000 C   0  0  0  0  0  0  0  0  0  0  0  0
   -2.8361    0.4854    0.0000 C   0  0  0  0  0  0  0  0  0  0  0  0
   -2.8361    1.3104    0.0000 C   0  0  0  0  0  0  0  0  0  0  0  0
   -2.1216    1.7229    0.0000 C   0  0  0  0  0  0  0  0  0  0  0  0
   -1.4071    1.3104    0.0000 C   0  0  0  0  0  0  0  0  0  0  0  0
   -2.1216    2.5479    0.0000 C   0  0  0  0  0  0  0  0  0  0  0  0
   -1.4071    2.9604    0.0000 C   0  0  0  0  0  0  0  0  0  0  0  0
   -0.6927    2.5479    0.0000 C   0  0  0  0  0  0  0  0  0  0  0  0
   -0.6927    1.7229    0.0000 C   0  0  0  0  0  0  0  0  0  0  0  0
    1.7592    0.6373    0.0000 C   0  0  0  0  0  0  0  0  0  0  0  0
    2.5797    0.7236    0.0000 C   0  0  0  0  0  0  0  0  0  0  0  0
    3.0646    0.0561    0.0000 C   0  0  0  0  0  0  0  0  0  0  0  0
    2.7291   -0.6975    0.0000 C   0  0  0  0  0  0  0  0  0  0  0  0
    1.9086   -0.7838    0.0000 C   0  0  0  0  0  0  0  0  0  0  0  0
   -1.0487   -2.1004    0.0000 C   0  0  0  0  0  0  0  0  0  0  0  0
   -1.6618   -2.6525    0.0000 C   0  0  0  0  0  0  0  0  0  0  0  0
   -2.4464   -2.3975    0.0000 C   0  0  0  0  0  0  0  0  0  0  0  0
   -2.6179   -1.5905    0.0000 C   0  0  0  0  0  0  0  0  0  0  0  0
   -2.0048   -1.0385    0.0000 C   0  0  0  0  0  0  0  0  0  0  0  0
    3.8822    0.1421    0.0000 Cl  0  0  0  0  0  0  0  0  0  0  0  0
   -3.0573   -2.9476    0.0000 O   0  0  0  0  0  0  0  0  0  0  0  0
   -3.8822   -2.9604    0.0000 C   0  0  0  0  0  0  0  0  0  0  0  0
  2  1  1  6      
  2  3  1  0      
  3  4  1  0      
  4  5  2  0      
  2  6  1  0      
  6  5  1  0      
  6  7  1  1      
  4  8  1  0      
  1  9  2  0      
  9 10  1  0      
 10 11  2  0      
 11 12  1  0      
 12 13  2  0      
 13  1  1  0      
 12 14  1  0      
 14 15  2  0      
 15 16  1  0      
 16 17  2  0      
 17 13  1  0      
  8 18  2  0      
 18 19  1  0      
 19 20  2  0      
 20 21  1  0      
 21 22  2  0      
 22  8  1  0      
  7 23  2  0      
 23 24  1  0      
 24 25  2  0      
 25 26  1  0      
 26 27  2  0      
 27  7  1  0      
 25 29  1  0      
 20 28  1  0      
 29 30  1  0      
M  END
